# Supplementary material for: Blood Pressure and the Risk of Developing Diabetes in African Americans and Whites: ARIC, CARDIA, and the Framingham Heart Study
Source: PubMed Central journal article supplement — Diabetes Care. 2011 Mar 21;34(4):873–9. doi: 10.2337/dc10-1786 (PMC3064044; doi:10.2337/dc10-1786), 2011-03-21
Supplement: supp_dc10-1786v101786_DC101786SupplementaryData.pdf [file supp_dc10-1786v101786_DC101786SupplementaryData.pdf]

**Supplementary Table 1. Baseline characteristics of those included in the analysis\* – simple, unadjusted means or proportions by study**

|                                         | ARIC       |       | CARDIA     |       | Framingham Offspring |       |
|-----------------------------------------|------------|-------|------------|-------|----------------------|-------|
|                                         | (N= 7,406) |       | (N= 1,826) |       | (N= 1,661)           |       |
|                                         | Mean or %  | Std   | Mean or %  | Std   | Mean or %            | Std   |
| Age (Years)                             | 49.9       | 3.15  | 37.7       | 1.72  | 47.5                 | 5.00  |
| Incident diabetes (%) <sup>†</sup>      | 11.00%     |       | 4.70%      |       | 7.90%                |       |
| African American (%)                    | 24.80%     |       | 39.20%     |       | 0.00%                |       |
| Women (%)                               | 57.80%     |       | 55.50%     |       | 55.00%               |       |
| Education < HS (%)                      | 16.20%     |       | 4.60%      |       | 2.20%                |       |
| Systolic BP (mmHg)                      | 116.8      | 16.84 | 109.6      | 12.76 | 119.7                | 15.94 |
| Diastolic BP (mmHg)                     | 73.6       | 11.03 | 72.5       | 10.12 | 74.7                 | 10.08 |
| Hypertension Meds (%)                   | 17.70%     |       | 3.30%      |       | 8.00%                |       |
| Normal BP <sup>‡</sup> (%)              | 51.70%     |       | 71.70%     |       | 47.50%               |       |
| Prehypertension <sup>‡</sup> (%)        | 23.00%     |       | 20.40%     |       | 33.10%               |       |
| Hypertension <sup>‡</sup> (%)           | 25.30%     |       | 7.90%      |       | 19.40%               |       |
| HDL (mg/dL)                             | 52.7       | 17.12 | 50.4       | 14.11 | 51.1                 | 14.76 |
| Triglycerides (mg/dL) <sup>§</sup>      | 121        | 79.60 | 92.7       | 72.32 | 131.4                | 99.29 |
| Fasting Glucose (mg/dL)                 | 97.9       | 9.20  | 90.3       | 7.91  | 93.3                 | 8.82  |
| Fasting insulin (uU/mL)                 | 10.6       | 7.97  | 12.9       | 7.11  | 8.3                  | 7.33  |
| Waist Circumference (cm)                | 95         | 13.78 | 85.5       | 13.79 | 90.8                 | 14.37 |
| Body mass index                         | 27.3       | 5.25  | 27.1       | 6.09  | 26.8                 | 4.89  |
| Alcohol: drinks/week                    | 3.3        | 7.02  | 4.6        | 8.74  | 5.6                  | 7.79  |
| Current smoker (%)                      | 26.60%     |       | 22.10%     |       | 22.00%               |       |
| Parent with DM (%)                      | 23.90%     |       | 22.90%     |       | 25.40%               |       |
| Physical activity Z score <sup>  </sup> | 0.04       | 0.98  | 0.03       | 0.98  | 0.01                 | 0.99  |

\* Eligibility criteria: At baseline age 35-54, no history of diabetes, and no missing data for core risk factors; and at least one follow-up exam.

<sup>†</sup> Incident Diabetes during follow-up by fasting glucose  $\geq 126$  mg/dL, on diabetes meds, or casual glucose of  $\geq 200$  mg/dL.

<sup>‡</sup> Blood Pressure (BP) categories:

- Normal: SBP<120 and DBP<80 mmHg and not using antihypertensive medication
- Prehypertension: Not hypertension, and SBP 120-139 or DBP 80-90 mmHg
- Hypertension: SBP= $\geq$ 140, DBP  $\geq$ 90 mmHg, or using antihypertensive medication

<sup>§</sup> Exponent of log transformed Triglycerides and therefore is approximately the median of the untransformed distribution. The standard deviation is from the distribution of log (triglycerides).

<sup>||</sup> Each study's physical activity measures were normalized to that study's population. A higher Z score means a greater physical activity level of that participant relative to others in the same

## SUPPLEMENTARY DATA

study. For example, a Z score of 1.96 means that that participant was more physically active than ~ 95% of the participants in that study.

SUPPLEMENTARY DATA

**Supplementary Table 2.** Hazard ratios (HR) for the association of baseline prehypertension and hypertension with incident diabetes after further adjustment for additional potential covariates\*

|                                                                      | African American |              |         |         | White |              |         |         |
|----------------------------------------------------------------------|------------------|--------------|---------|---------|-------|--------------|---------|---------|
|                                                                      | HR               | 95% Conf Int |         | P-value | HR    | 95% Conf Int |         | P-value |
| Model 3 <sup>†</sup> (For comparison)                                |                  |              |         |         |       |              |         |         |
| N (Events)                                                           | 2,552            | (372)        |         |         | 8,341 | (657)        |         |         |
| Prehypertension                                                      | 0.86             | (0.63        | , 1.17) | 0.3417  | 1.32  | (1.09        | , 1.61) | 0.0046  |
| Hypertension                                                         | 0.92             | (0.70        | , 1.21) | 0.5499  | 1.25  | (1.03        | , 1.53) | 0.0262  |
| Model 4 (Model 3 + Waist Circumference and Fasting Insulin)          |                  |              |         |         |       |              |         |         |
| N (Events)                                                           | 2,552            | (372)        |         |         | 8,341 | (657)        |         |         |
| Prehypertension                                                      | 0.87             | (0.64        | , 1.18) | 0.3547  | 1.31  | (1.08        | , 1.59) | 0.0069  |
| Hypertension                                                         | 0.90             | (0.68        | , 1.19) | 0.4581  | 1.23  | (1.00        | , 1.50) | 0.0464  |
| Model 5 (Model 4 + Additional Covariates <sup>‡</sup> )              |                  |              |         |         |       |              |         |         |
| N (Events)                                                           | 2,528            | (369)        |         |         | 8,223 | (651)        |         |         |
| Prehypertension                                                      | 0.87             | (0.64        | , 1.18) | 0.3629  | 1.33  | (1.09        | , 1.62) | 0.0046  |
| Hypertension                                                         | 0.94             | (0.68        | , 1.31) | 0.7253  | 1.37  | (1.07        | , 1.75) | 0.0111  |
| Model 6 (Model 5 + Educational Level + Parental History of Diabetes) |                  |              |         |         |       |              |         |         |
| N (Events)                                                           | 2,495            | (366)        |         |         | 7,626 | (602)        |         |         |
| Prehypertension                                                      | 0.89             | (0.65        | , 1.21) | 0.4598  | 1.32  | (1.07        | , 1.62) | 0.0090  |
| Hypertension                                                         | 0.94             | (0.68        | , 1.31) | 0.7103  | 1.42  | (1.10        | , 1.82) | 0.0068  |

\*Using normal blood pressure (SBP<120 and DBP<80 mmHg and not using antihypertensive medication) as referent for prehypertension and hypertension. Diabetes during follow-up defined as fasting glucose = or >126 mg/dL, casual glucose = or >200 mg/dL, or use of diabetic drugs.

<sup>†</sup> Model 3 Covariates: Age, sex, body mass index (5 units), HDL (15 mg/dL), fasting glucose (10 mg/dL), and Ln(Triglycerides)

<sup>‡</sup> Additional Covariates include: fasting insulin (8 uU/ml), waist circumference (15 cm), ACEI or ARB, beta blocker, thiazide, other hypertension medication, current Smoking, alcohol drinks/week (8 drinks), and physical activity Z-Score (1 unit)
